# Supplementary material
Source: PubMed Central journal article supplement (PMC6179368)
Supplement: NIHMS1506844-supplement-2.pdf [file NIHMS1506844-supplement-2.pdf]

| Construct                                               | Cas13d binary complex                                              | Cas13d ternary complex                                             | Cas13d apo form                                                     |
|---------------------------------------------------------|--------------------------------------------------------------------|--------------------------------------------------------------------|---------------------------------------------------------------------|
| <b>Data collection and Image Processing</b>             |                                                                    |                                                                    |                                                                     |
| Microscope                                              | Arctica Talos                                                      | Titan Krios                                                        | Arctica Talos                                                       |
| Voltage (kV)                                            | 200                                                                | 300                                                                | 200                                                                 |
| Camera                                                  | Gatan K2 Summit                                                    | Gatan K2 Summit                                                    | Gatan K2 Summit                                                     |
| Defocus range ( $\mu\text{m}$ )                         | 0.5-2.0                                                            | 1.0-3.0                                                            | 0.8-2.5                                                             |
| Defocus mean $\pm$ std ( $\mu\text{m}$ )                | 1.1 $\pm$ 0.3                                                      | 2.0 $\pm$ 0.4                                                      | 1.6 $\pm$ 0.5                                                       |
| Exposure time (s)                                       | 12                                                                 | 12                                                                 | 12                                                                  |
| Dose rate (e- /pixel/s)                                 | 2.5                                                                | 3.0                                                                | 2.5                                                                 |
| Total dose (e- / $\text{\AA}^2$ )                       | 56.8                                                               | 57.3                                                               | 56.8                                                                |
| Pixel size ( $\text{\AA}$ )                             | 0.73                                                               | 0.79                                                               | 0.73                                                                |
| Exposure rate (ms)                                      | 100                                                                | 200                                                                | 100                                                                 |
| Number of micrographs                                   | 1435                                                               | 2205                                                               | 1158                                                                |
| Number of particles (processed)                         | 412591                                                             | 684169                                                             | 330986                                                              |
| Number of particles (3D classification & refinement)    | 207849                                                             | 177910                                                             | 154889                                                              |
| Number of particles (in final map)                      | 43786                                                              | 51885                                                              | 15846                                                               |
| Symmetry                                                | C1                                                                 | C1                                                                 | C1                                                                  |
| Resolution (global) ( $\text{\AA}$ )*                   | 3.4                                                                | 3.3                                                                | 6.5                                                                 |
| Resolution range (homogeneous portion) ( $\text{\AA}$ ) | 3.0-5.0                                                            | 3.0-5.0                                                            | 6.0-8.0                                                             |
| Map sharpening                                          | Spectral flattening<br>between 8 $\text{\AA}$ and 3.4 $\text{\AA}$ | Spectral flattening<br>between 8 $\text{\AA}$ and 3.3 $\text{\AA}$ | Spectral flattening<br>between 10 $\text{\AA}$ and 6.5 $\text{\AA}$ |
| Sphericity @ threshold 0.75                             | 0.98                                                               | 0.89                                                               | 0.97                                                                |
| <b>Model refinement</b>                                 |                                                                    |                                                                    |                                                                     |
| Number of atoms (modeled)                               | 8163                                                               | 8834                                                               |                                                                     |
| Protein                                                 |                                                                    |                                                                    |                                                                     |
| Favored rotamers (%)                                    | 97.4                                                               | 94.6                                                               |                                                                     |
| Poor rotamers (%)                                       | 0.26                                                               | 0.0                                                                |                                                                     |
| Ramachandran favored (%)                                | 95.9                                                               | 91.9                                                               |                                                                     |
| Ramachandran outliers (%)                               | 0.0                                                                | 0.0                                                                |                                                                     |
| C $\beta$ deviations >0.25 $\text{\AA}$ (%)             | 0.0                                                                | 0.0                                                                |                                                                     |
| Cis prolines (%)                                        | 0.0                                                                | 0.0                                                                |                                                                     |
| Cis prolines (%)                                        | 0.0                                                                | 0.0                                                                |                                                                     |
| Bad bonds (%)                                           | 0.0                                                                | 0.0                                                                |                                                                     |
| Bad angles (%)                                          | 0.0                                                                | 0.0                                                                |                                                                     |
| Nucleic acid                                            |                                                                    |                                                                    |                                                                     |
| Probably wrong sugar puckers (%)                        | 0.0                                                                | 0.0                                                                |                                                                     |
| Bad backbone conformations (%)                          | 11.8                                                               | 12.7                                                               |                                                                     |
| Bad bonds (%)                                           | 0.0                                                                | 0.0                                                                |                                                                     |
| Bad angles (%)                                          | 0.0                                                                | 0.0                                                                |                                                                     |

\*Resolution assessment based on frequency- limited refinement using the 0.143 threshold for resolution analysis

**Supplementary Table 1. Cryo-EM data collection, image processing, and modeling summary.**  
Related to Figures 1 and 6

| <b>Name</b>        | <b>Sequence (5' to 3')</b>                                                                                                                     | <b>Figure</b> |
|--------------------|------------------------------------------------------------------------------------------------------------------------------------------------|---------------|
| ternary target     | ACGUUUUGAUCUGAAAUAUUCAGGUCUAUA                                                                                                                 | 1E-G, 2       |
| ssRNA-1 target 1   | UACGUACGCCAUCUCAUCCUGCGUGUCUCCUACGAUUUG<br>AUCUGAAAUAAGAGGUCUCGUACAUCACCGACUGCCCAU<br>AGAGAGGUUAUCCGCUCACAAUCCACACAACAUCGAGC<br>CGGAAGCAUAAAG  | 3F            |
| ssRNA-2 target 2   | UACGUACGCCAUCUCAUCCUGCGUGUCUCCUACGAUUUG<br>AUCUGAAAUAUUCAGGUCUCGUACAUCACCGACUGCCCAU<br>AGAGAGGUUAUCCGCUCACAAUCCACACAACAUCGAGC<br>CGGAAGCAUAAAG | 3G, S3G       |
| competitor 1 - WT  | UCCUUUUGAUCUGAAAUAUUCAGGUCUCCU                                                                                                                 | 4D-E          |
| competitor 1 - MM1 | UCCUAAACAUCUGAAAUAUUCAGGUCUCCU                                                                                                                 | 4D-E          |
| competitor 1 - MM2 | UCCUUUUGAAGACAAAUAUUCAGGUCUCCU                                                                                                                 | 4D-E          |
| competitor 1 - MM3 | UCCUUUUGAUCUGUUUAAUUCAGGUCUCCU                                                                                                                 | 4D-E          |
| competitor 1 - MM4 | UCCUUUUGAUCUGAAAUAAGAGGUCUCCU                                                                                                                  | 4D-E          |
| competitor 1 - MM5 | UCCUUUUGAUCUGAAAUAUUCACCAGUCCU                                                                                                                 | 4D-E          |
| competitor 2 - WT  | UCCUGAGUUCAUCCAGUGUAUCCUUCUCCU                                                                                                                 | 4D-E          |
| competitor 2 - MM1 | UCCUCUCAUCAUCCAGUGUAUCCUUCUCCU                                                                                                                 | 4D-E          |
| competitor 2 - MM2 | UCCUGAGUUGUAGCAGUGUAUCCUUCUCCU                                                                                                                 | 4D-E          |
| competitor 2 - MM3 | UCCUGAGUUCAUCGUCAGUAUCCUUCUCCU                                                                                                                 | 4D-E          |
| competitor 2 - MM4 | UCCUGAGUUCAUCCAGUCAUACCUUCUCCU                                                                                                                 | 4D-E          |
| competitor 2 - MM5 | UCCUGAGUUCAUCCAGUGUAUCGAAGUCCU                                                                                                                 | 4D-E          |
| competitor 3 - WT  | UCCUCA AUGCGUGAGUGUGAAGAUAGUCCU                                                                                                                | 4D-E          |
| competitor 3 - MM1 | UCCUGUAGCGUGAGUGUGAAGAUAGUCCU                                                                                                                  | 4D-E          |
| competitor 3 - MM2 | UCCUCA AUGGCACAGUGUGAAGAUAGUCCU                                                                                                                | 4D-E          |
| competitor 3 - MM3 | UCCUCA AUGCGUGUCACUGAAGAUAGUCCU                                                                                                                | 4D-E          |
| competitor 3 - MM4 | UCCUCA AUGCGUGAGUGACUUGAUAGUCCU                                                                                                                | 4D-E          |
| competitor 3 - MM5 | UCCUCA AUGCGUGAGUGUGAAGUAUCUCCU                                                                                                                | 4D-E          |
| competitor 4 - WT  | UCCUCCA UAGAGAGGUUAUCCGCUCAUCCU                                                                                                                | 4D-E          |
| competitor 4 - MM1 | UCCUGGUAAGAGAGGUUAUCCGCUCAUCCU                                                                                                                 | 4D-E          |
| competitor 4 - MM2 | UCCUCCA UACUCUGGUUAUCCGCUCAUCCU                                                                                                                | 4D-E          |
| competitor 4 - MM3 | UCCUCCA UAGAGACCAAUCCGCUCAUCCU                                                                                                                 | 4D-E          |
| competitor 4 - MM4 | UCCUCCA UAGAGAGGUUUAGGGCUCUCCU                                                                                                                 | 4D-E          |
| competitor 4 - MM5 | UCCUCCA UAGAGAGGUUAUCCGGAGUCCU                                                                                                                 | 4D-E          |

|                   |                                                                                                                                                    |                                |
|-------------------|----------------------------------------------------------------------------------------------------------------------------------------------------|--------------------------------|
| DR mut crRNA WT   | CACCCGUGCAAAA AUGCAGGGGUCUAAAACGACCUCUAA<br>UUUCAGAUCAA                                                                                            | 3F                             |
| DR mut crRNA G22A | CACCCGUGCAAAA AUGCAGGGCUCUAAAACGACCUCUAA<br>UUUCAGAUCAA                                                                                            | 3F                             |
| DR mut crRNA U23A | CACCCGUGCAAAA AUGCAGGGGACUAAAACGACCUCUAA<br>UUUCAGAUCAA                                                                                            | 3F                             |
| DR mut crRNA A26C | CACCCGUGCAAAA AUGCAGGGGUCUCAACGACCUCUAA<br>UUUCAGAUCAA                                                                                             | 3F                             |
| DR mut crRNA A27C | CACCCGUGCAAAA AUGCAGGGGUCUACAACGACCUCUAA<br>UUUCAGAUCAA                                                                                            | 3F                             |
| DR mut crRNA A28C | CACCCGUGCAAAA AUGCAGGGGUCUAAACGACCUCUAA<br>UUUCAGAUCAA                                                                                             | 3F                             |
| DR mut crRNA A29C | CACCCGUGCAAAA AUGCAGGGGUCUAAACCGACCUCUAA<br>UUUCAGAUCAA                                                                                            | 3F                             |
| DR mut crRNA C30G | CACCCGUGCAAAA AUGCAGGGGUCUAAAAGGACCUCUAA<br>UUUCAGAUCAA                                                                                            | 3F                             |
| crRNA-1-Es        | CACCCGUGCAAAA AUGCAGGGGUCUAAAACGACCUGAAUA<br>UUUCAGAUCAA                                                                                           | 1, 2, 3G,<br>4D-E, S3D,<br>S3G |
| crRNA-1-Ur        | CACUGGUGCAAAU UAGCACUAGUCUAAAACGACCUGAAUA<br>UUUCAGAUCAA                                                                                           | 3G                             |
| crRNA-1-Rff       | UAGUAGUGUGAAUUUACACUACUCUAAAACGACCUGAAUA<br>UUUCAGAUCAA                                                                                            | 3G                             |
| crRNA-1-Rfx       | AACCCCUACCAACUGGUCGGGGUUUGAAACGACCUGAAUA<br>UUUCAGAUCAA                                                                                            | 3G                             |
| crRNA-2           | CACCCGUGCAAAA AUGCAGGGGUCUAAAACGAAGGAUACA<br>CUGGAUGAACUC                                                                                          | 4D-E                           |
| crRNA-3           | CACCCGUGCAAAA AUGCAGGGGUCUAAAACCUAUCUUCAC<br>ACUCACGCAUUG                                                                                          | 4D-E                           |
| crRNA-4           | CACCCGUGCAAAA AUGCAGGGGUCUAAAACUGAGCGGAUA<br>ACCUCUCUAUGG                                                                                          | 4D-E                           |
| pre-crRNA-1       | GAACUACACCCGUGCAAAA AUGCAGGGGUCUAAAACGACC<br>UGAAUAUUUCAGAUCAAAAUAGCAAUGAACUACACCCGUG<br>CAAAA AUGCAGGGGUCUAAAACAUUCCUUAUCUAAAUAGC<br>AUAUGCUUCUGU | S3A, S3C,<br>S3G-H             |

**Supplementary Table 2. Oligonucleotides used in this study.** Related to Figures 1-4, and S3
