# Supplementary material
Source: PubMed Central journal article supplement (PMC6179368)

**A**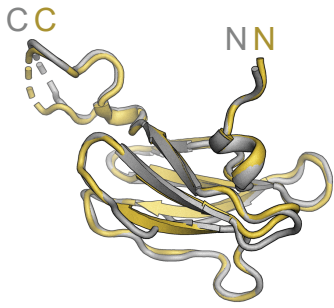

aa:58-150  
 NTD Ternary  
 NTD Binary

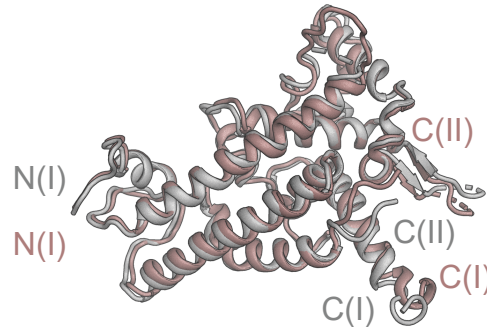

aa:151-344, 496-577  
 HEPN1 Ternary  
 HEPN1 Binary

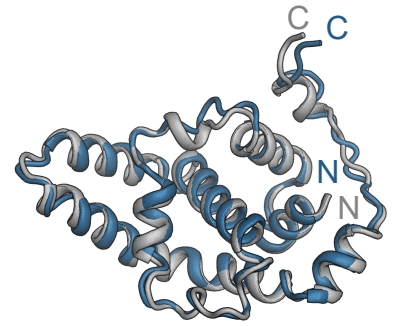

aa:345-495  
 Helical1 Ternary  
 Helical1 Binary

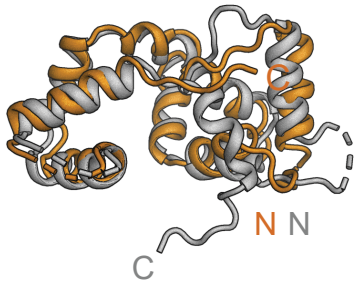

aa:578-727  
 Helical2 Ternary  
 Helical2 Binary

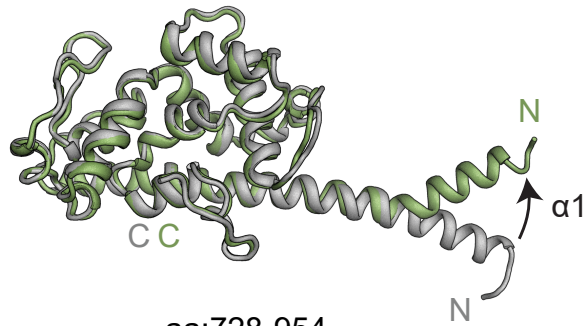

aa:728-954  
 HEPN2 Ternary  
 HEPN2 Binary

**B**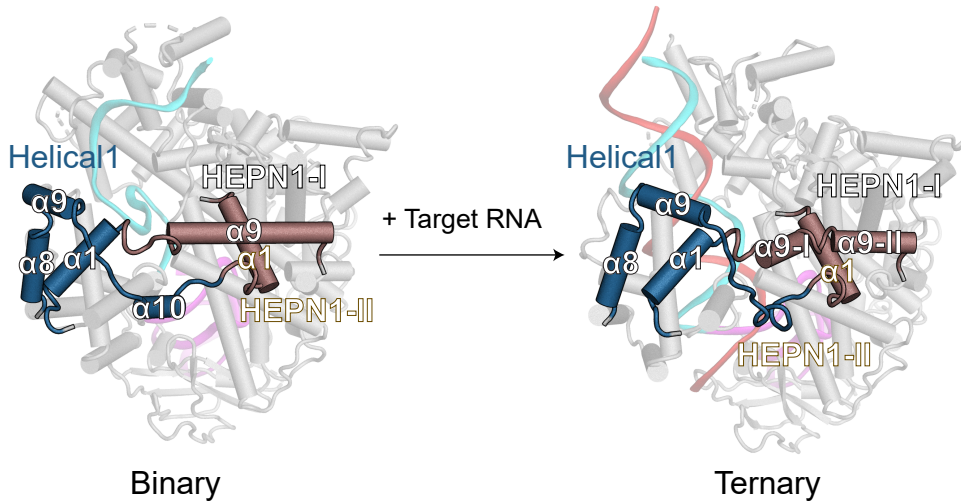**C**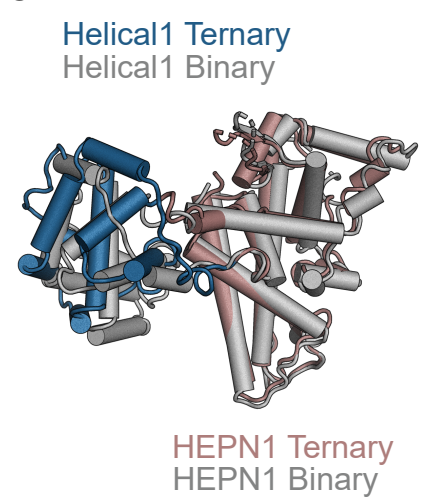

Supplement: NIHMS1506844-supplement-6.pdf [file NIHMS1506844-supplement-6.pdf]
