# Supplementary material
Source: PubMed Central journal article supplement (PMC6179368)

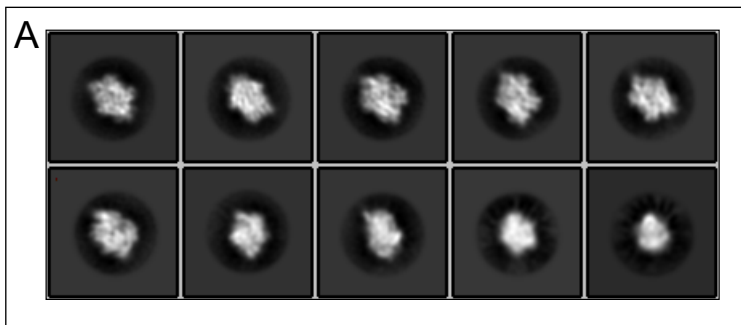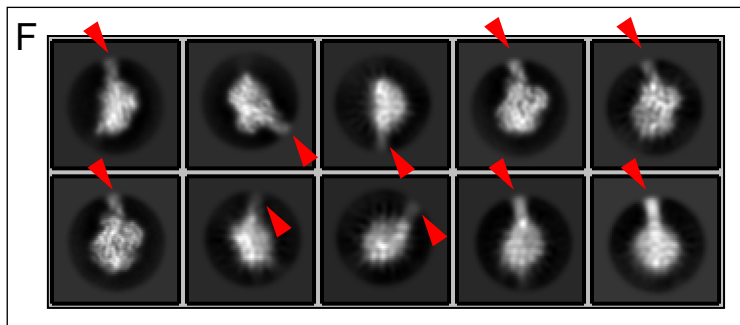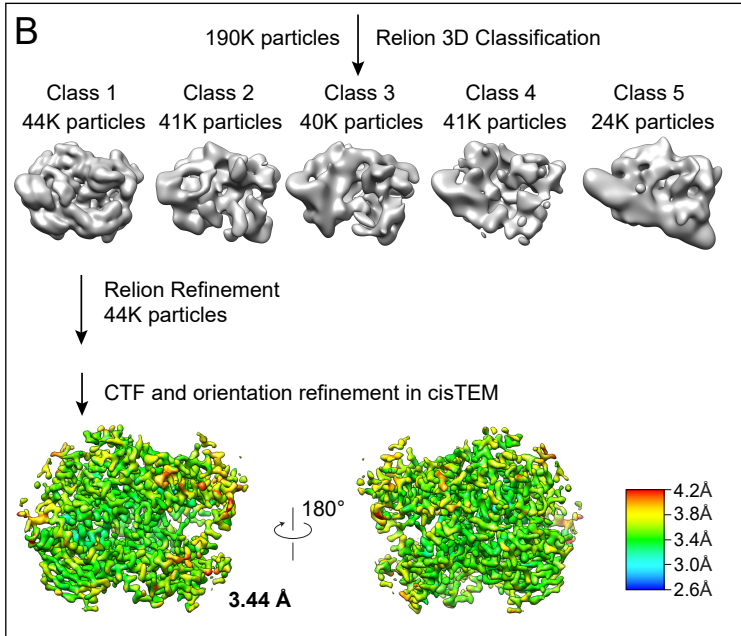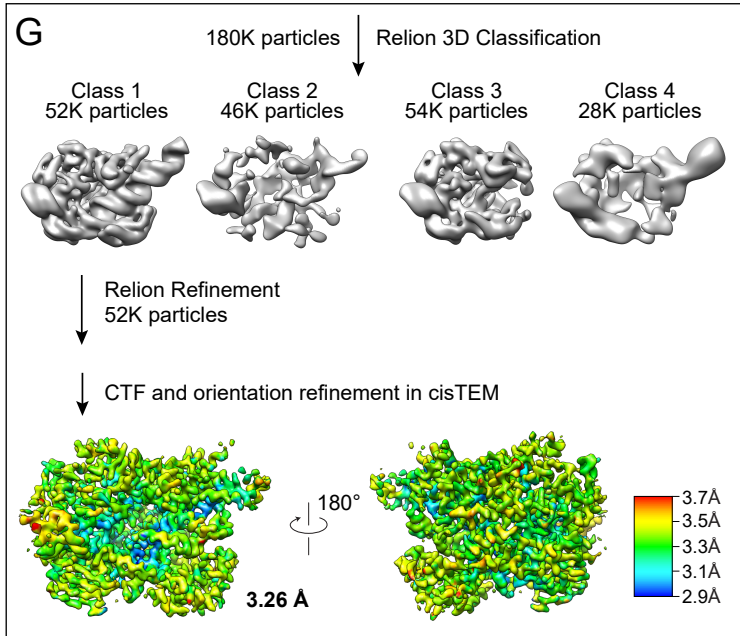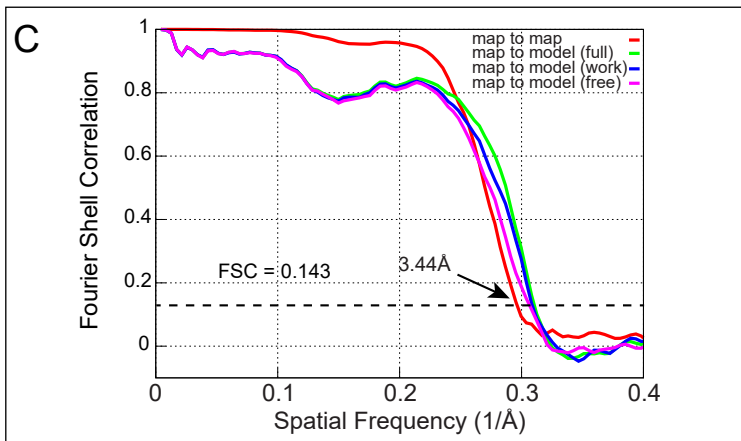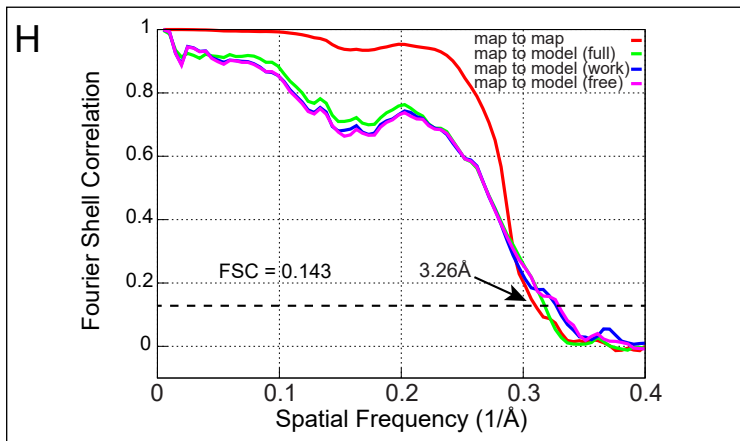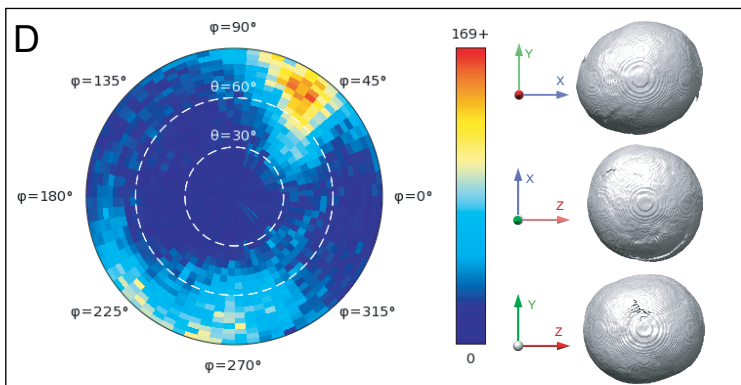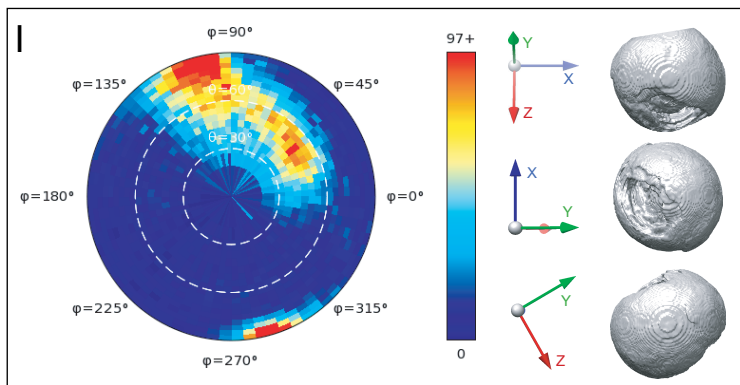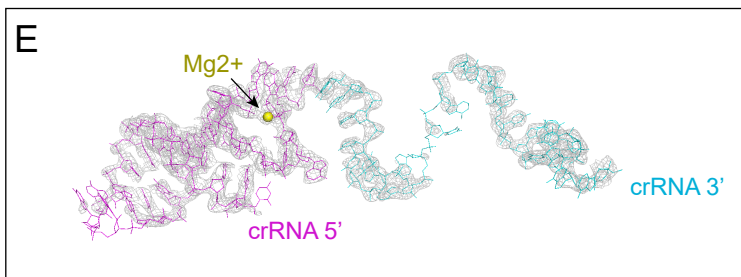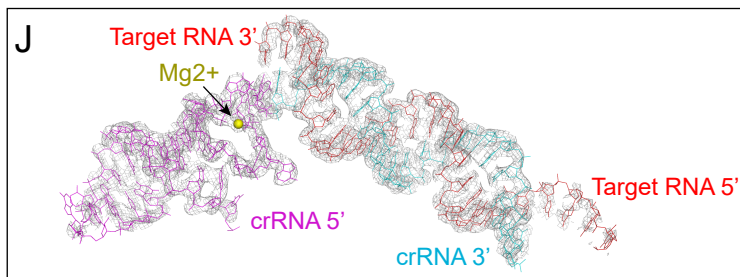

Supplement: NIHMS1506844-supplement-3.pdf [file NIHMS1506844-supplement-3.pdf]

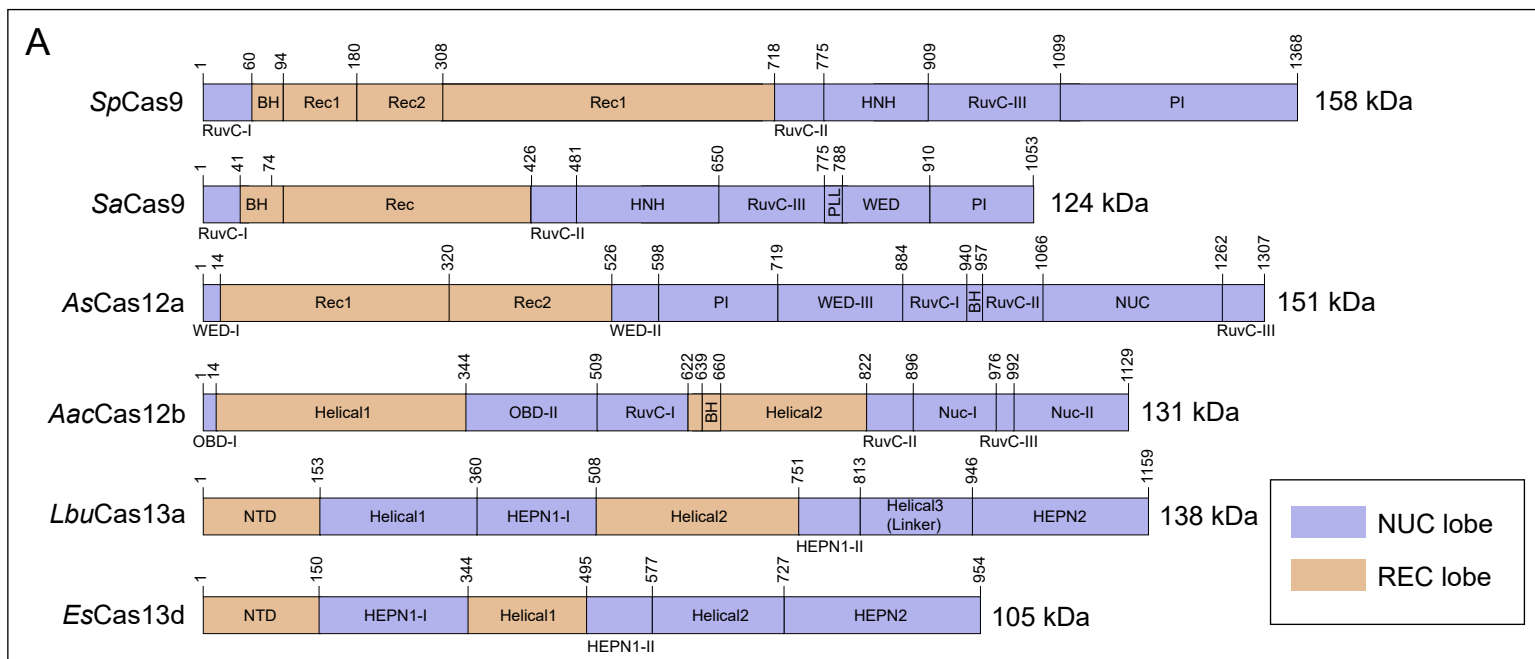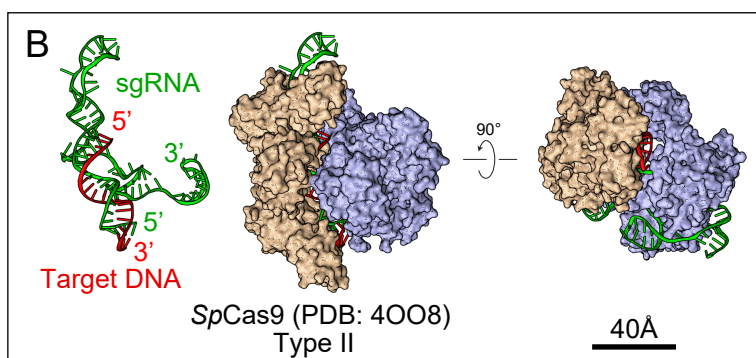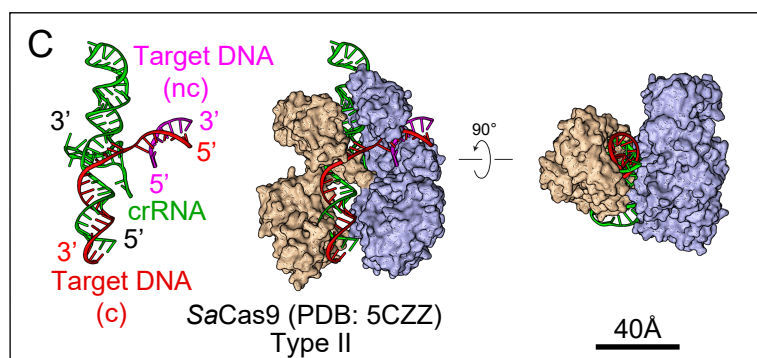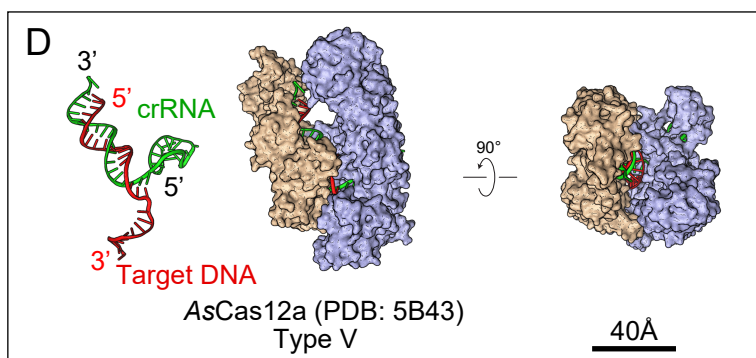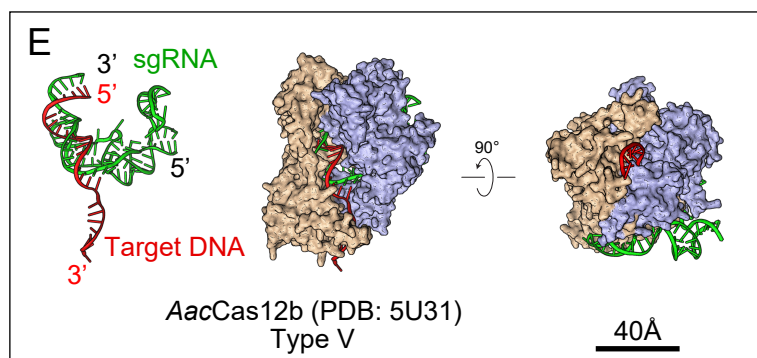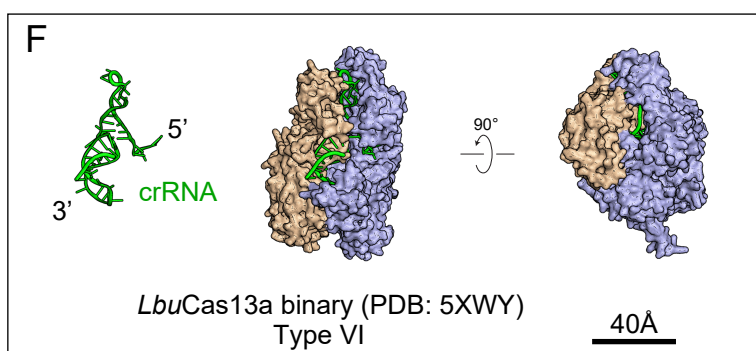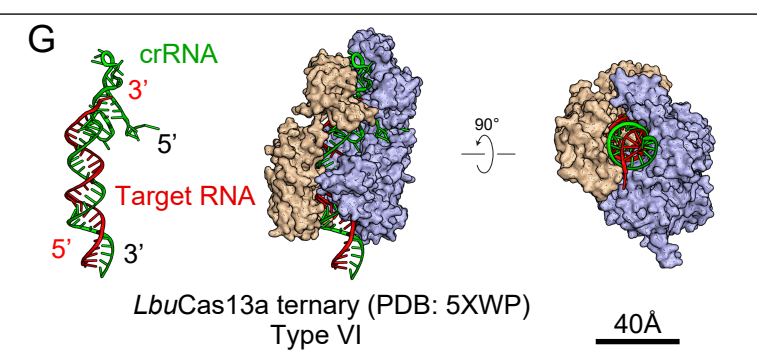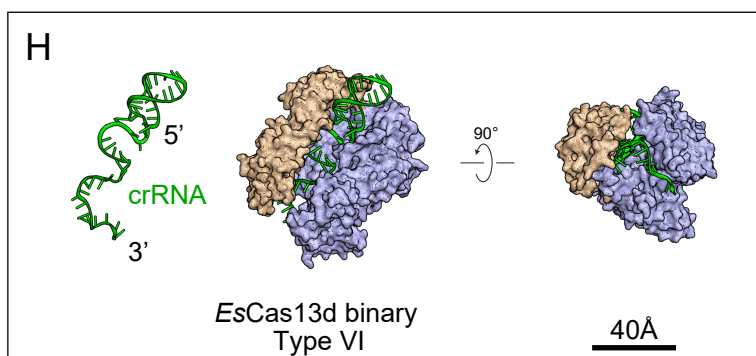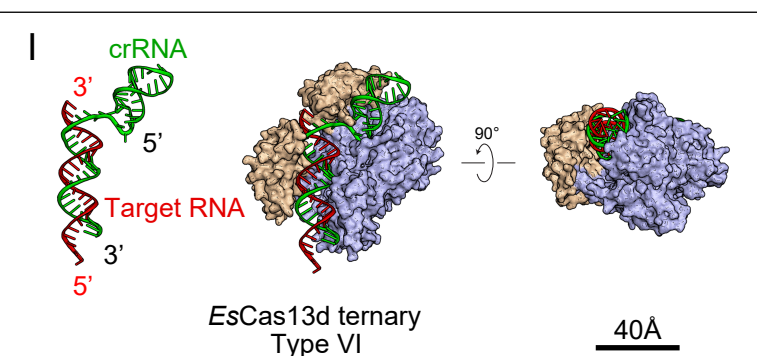

Supplement: NIHMS1506844-supplement-4.pdf [file NIHMS1506844-supplement-4.pdf]

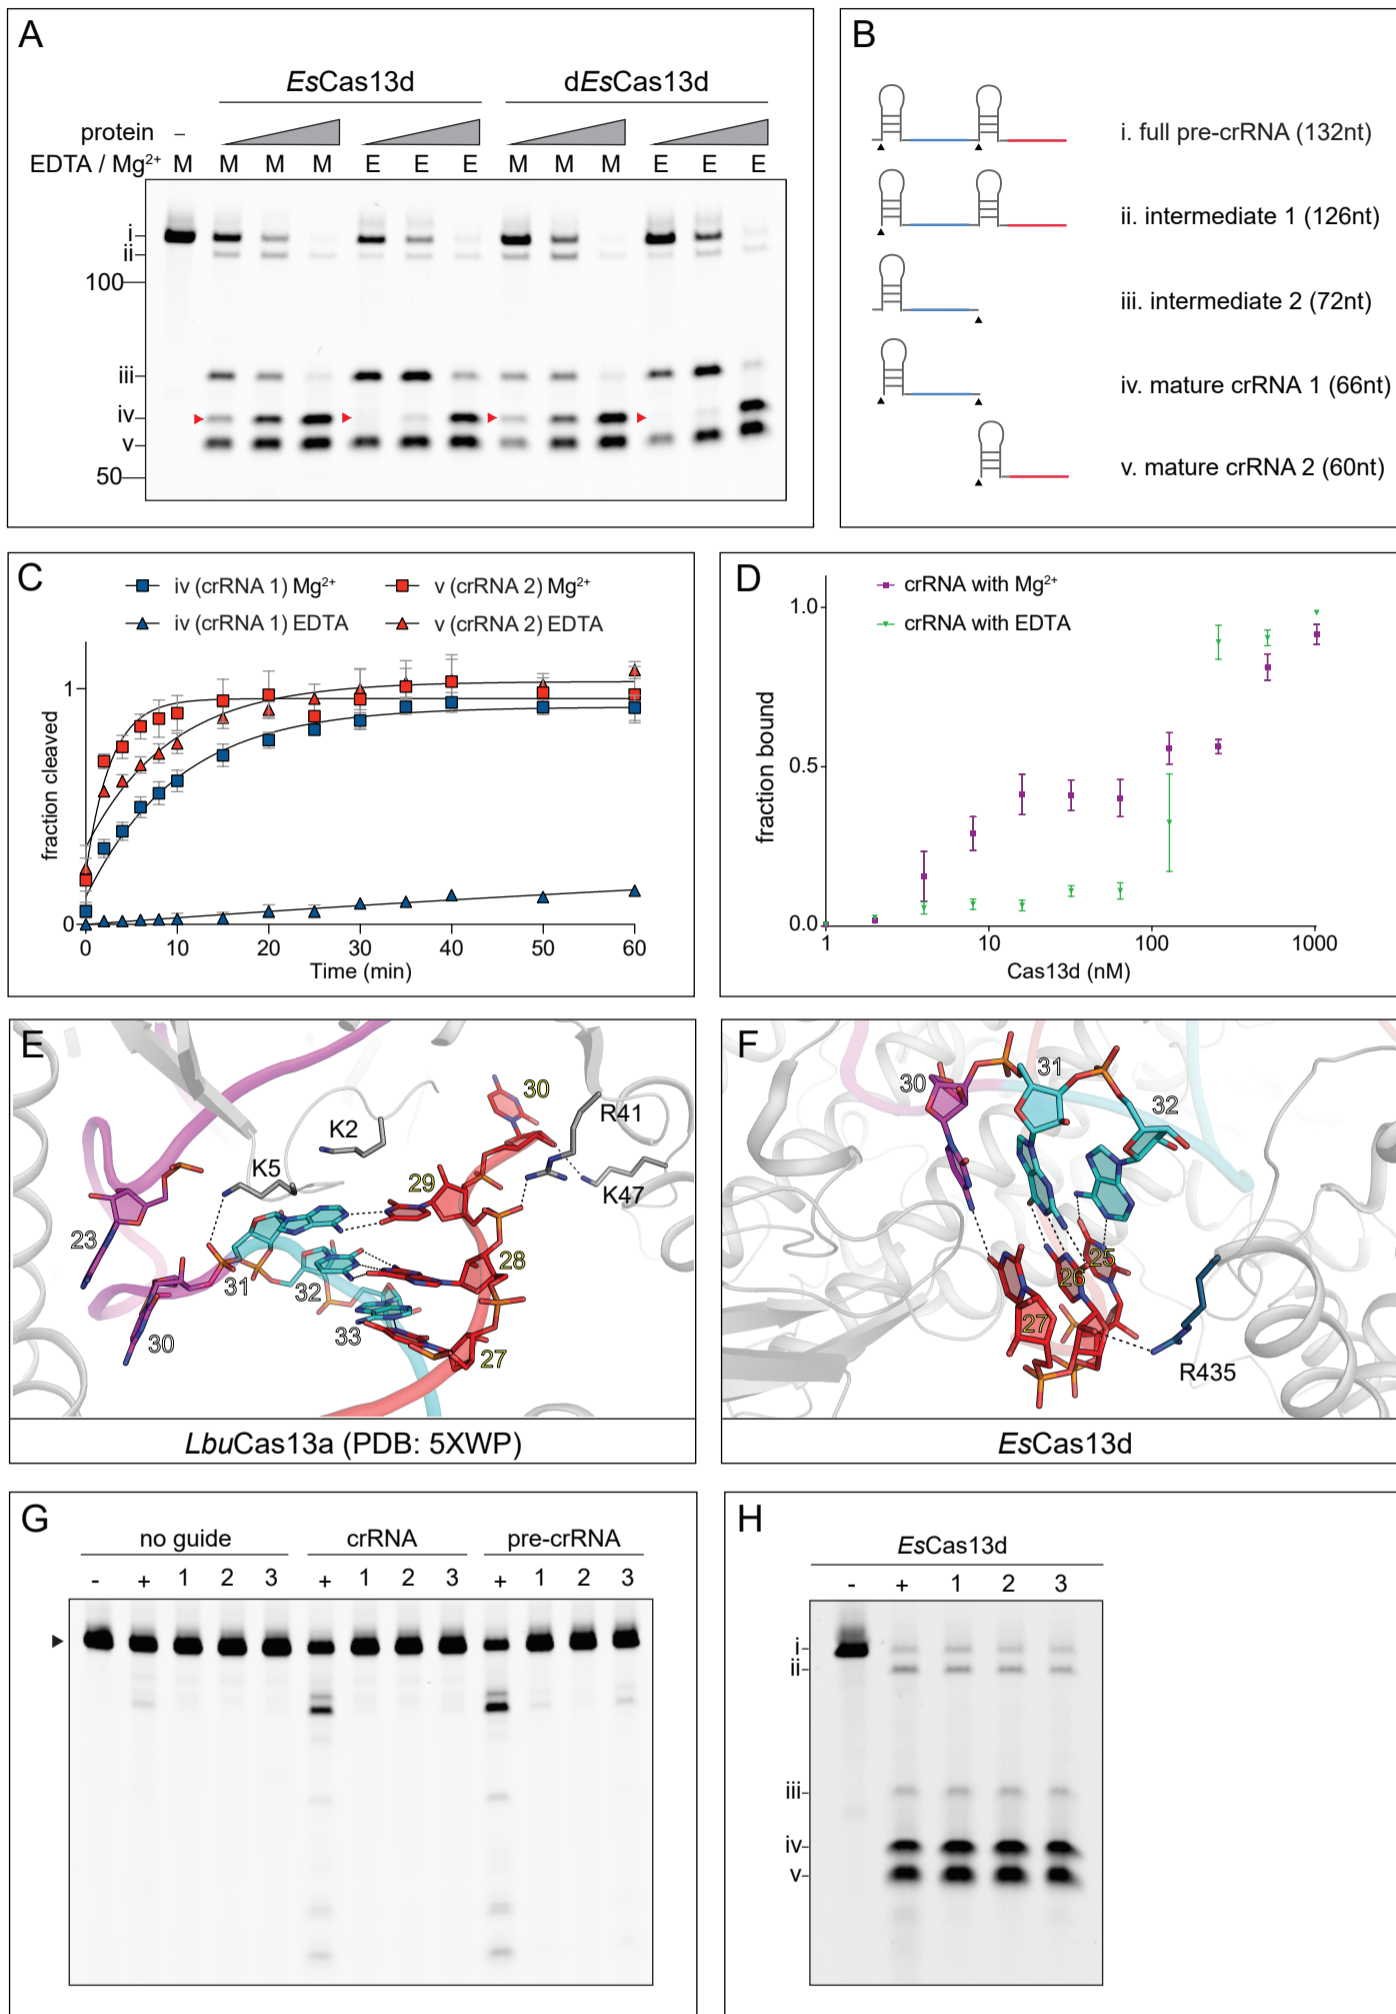

Supplement: NIHMS1506844-supplement-5.pdf [file NIHMS1506844-supplement-5.pdf]

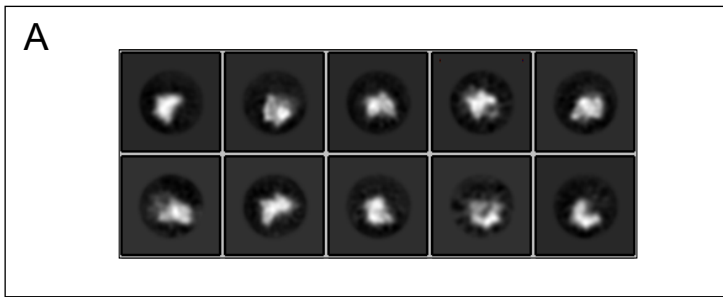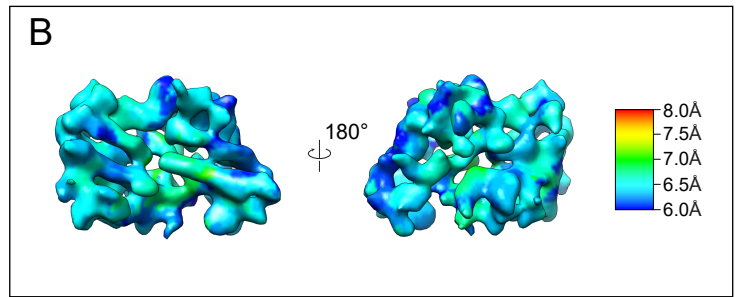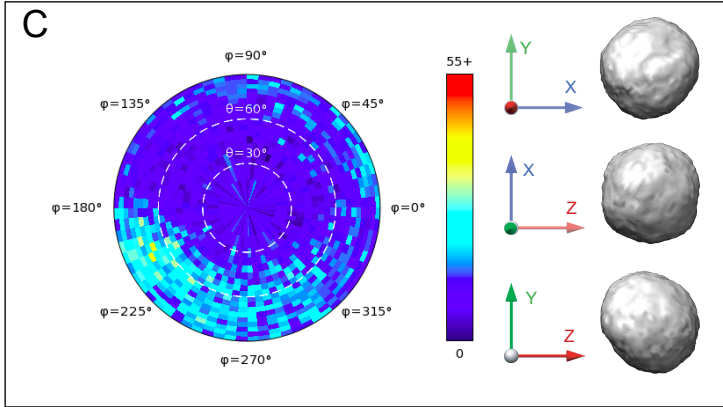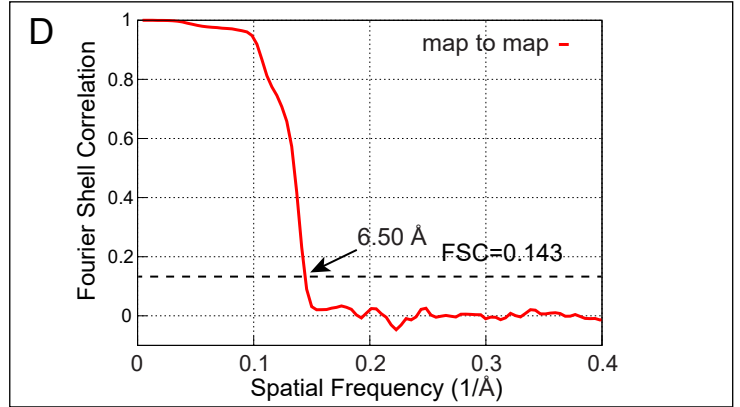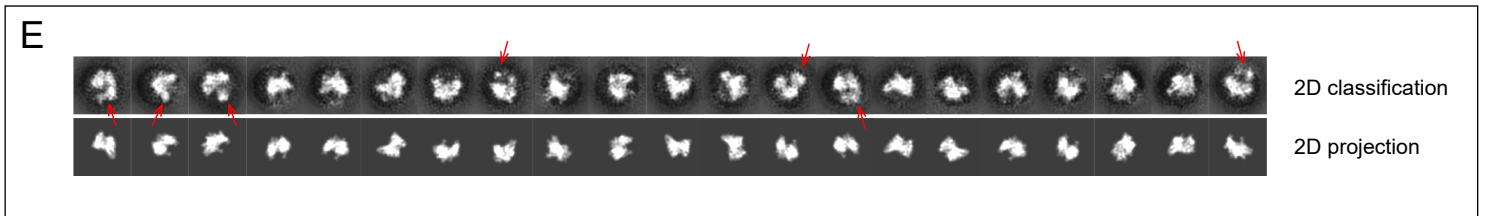

Supplement: NIHMS1506844-supplement-7.pdf [file NIHMS1506844-supplement-7.pdf]

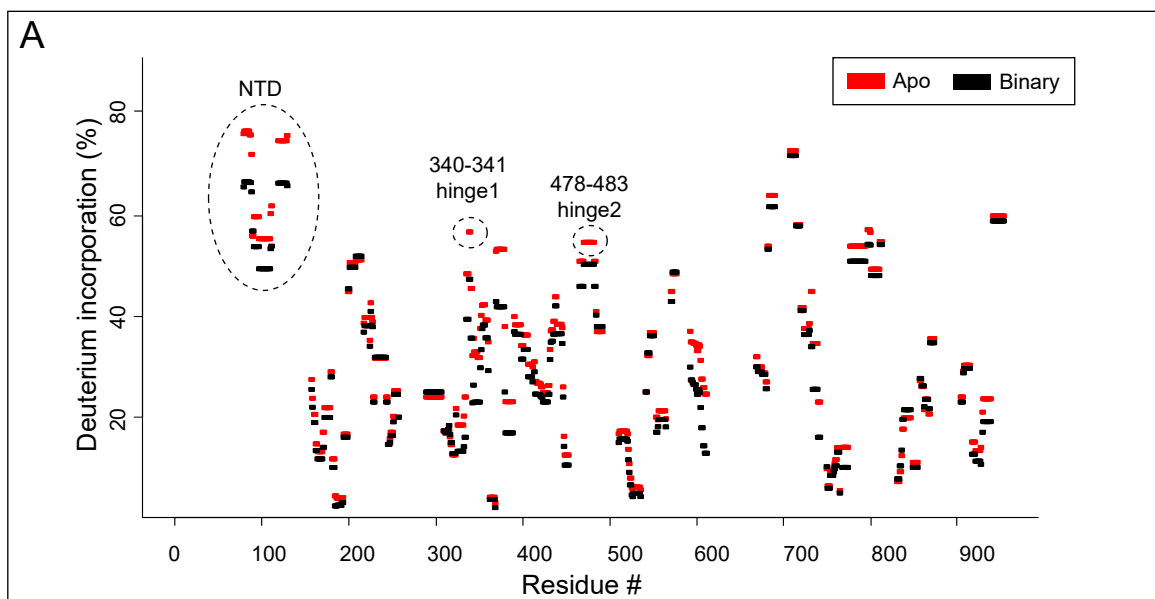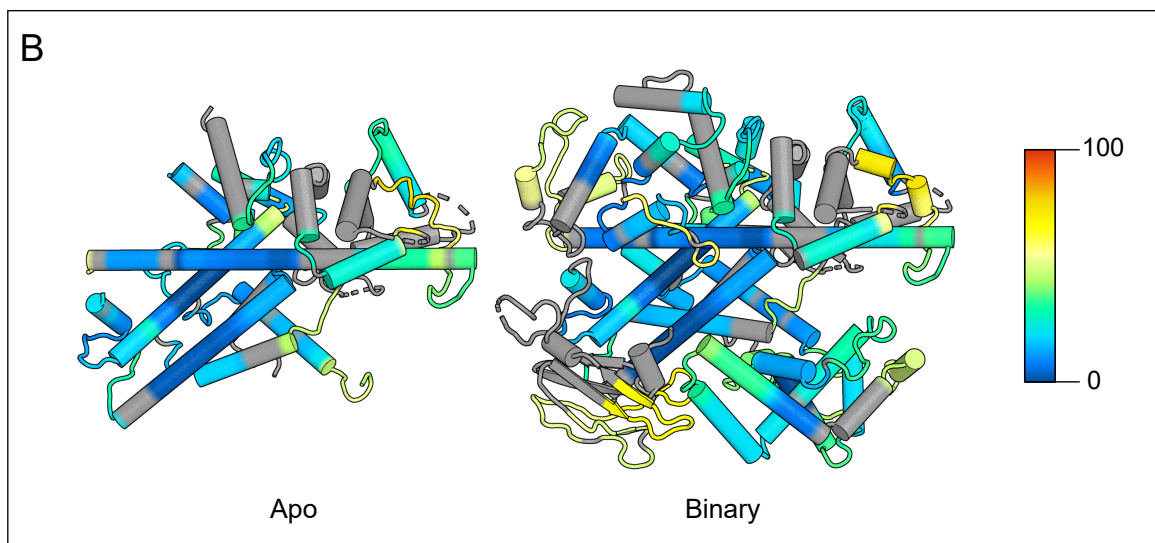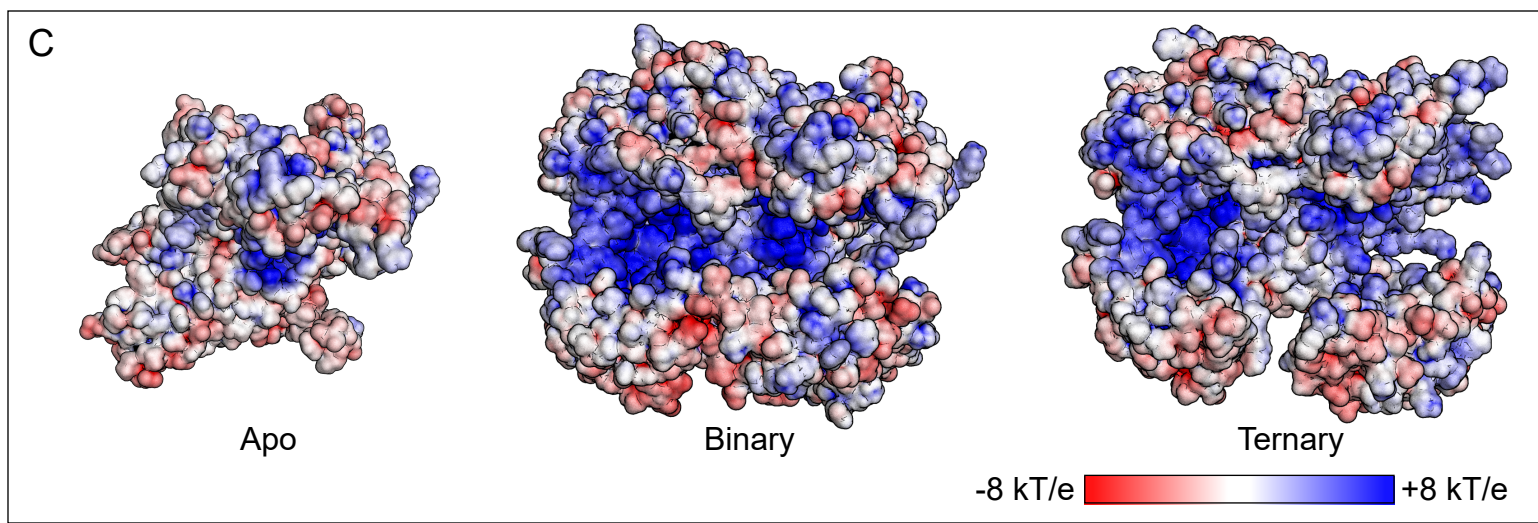

Supplement: NIHMS1506844-supplement-8.pdf [file NIHMS1506844-supplement-8.pdf]

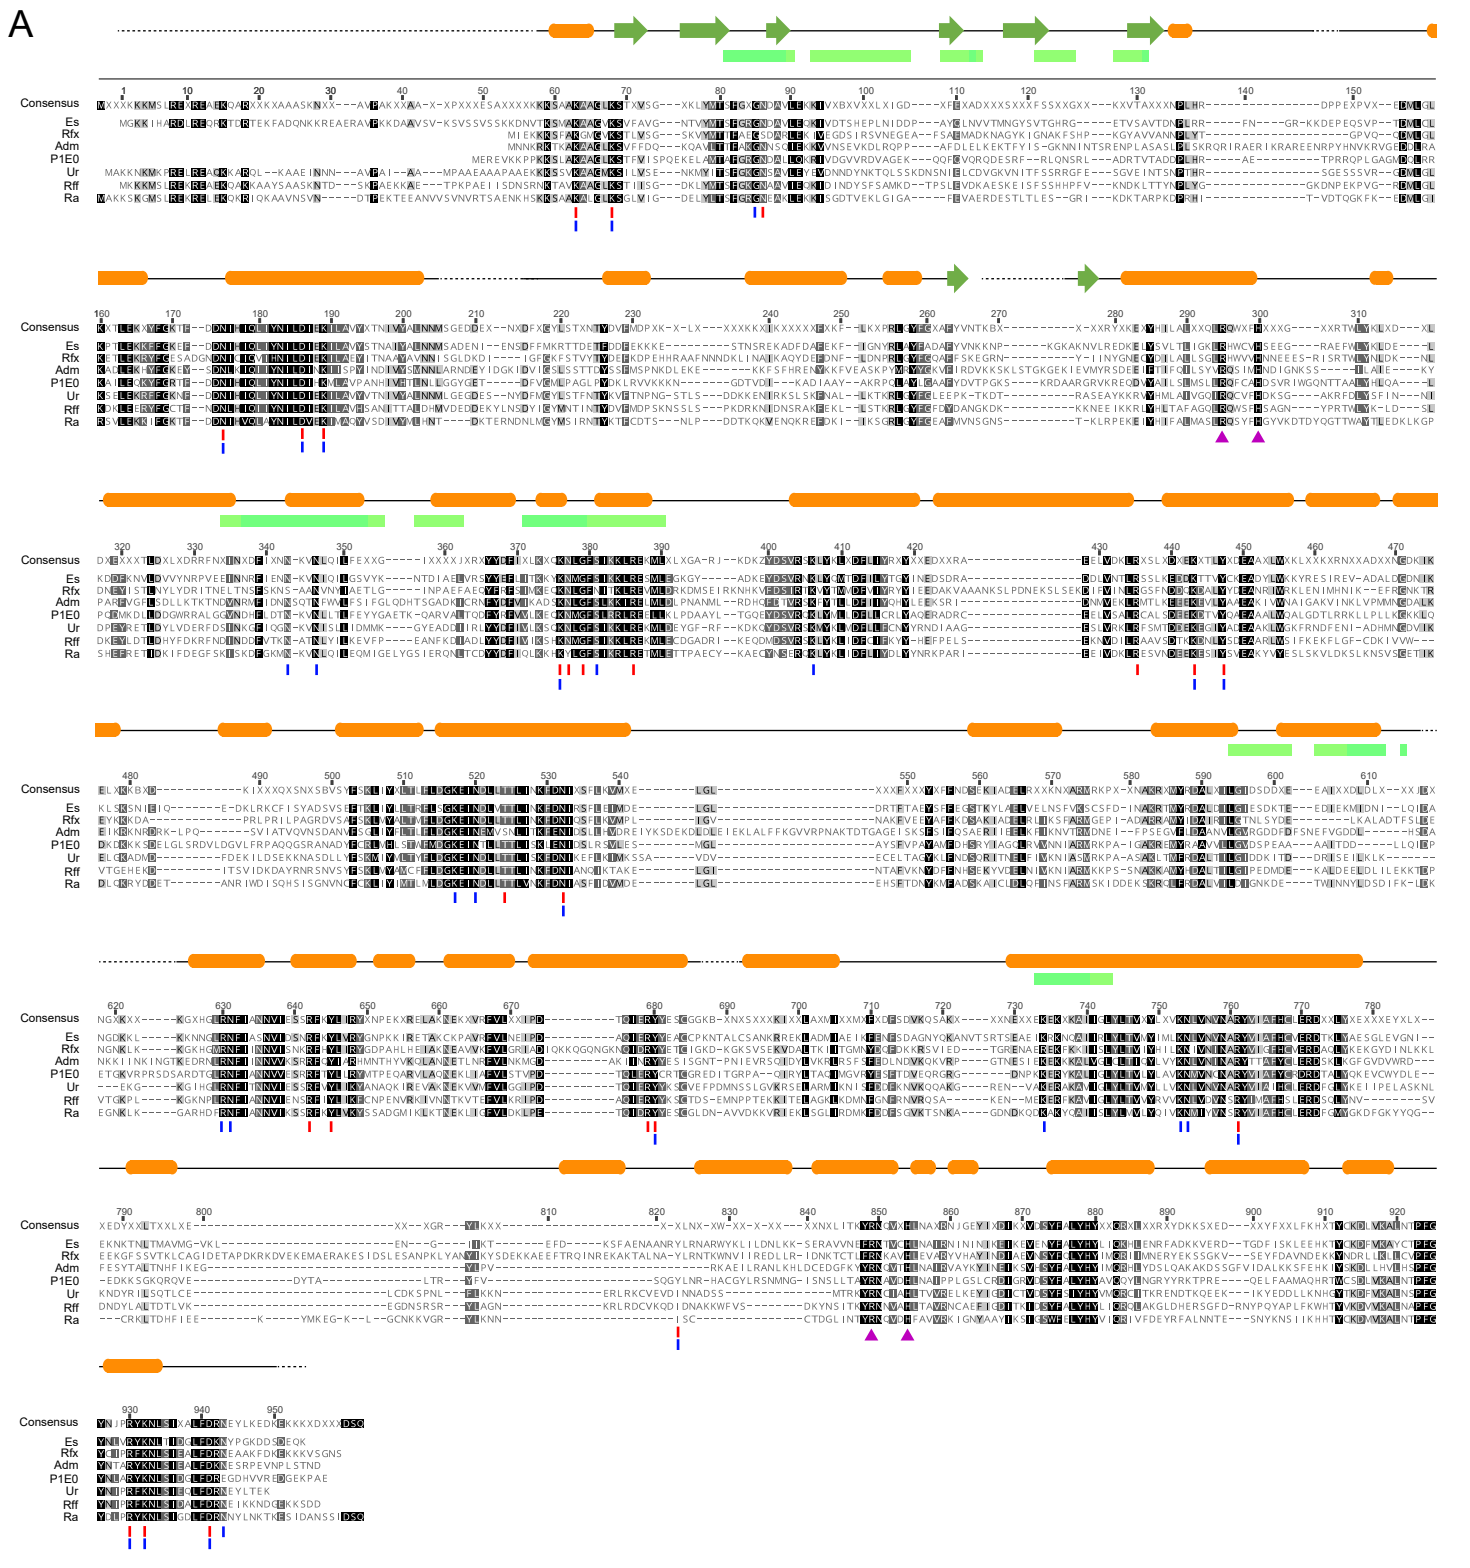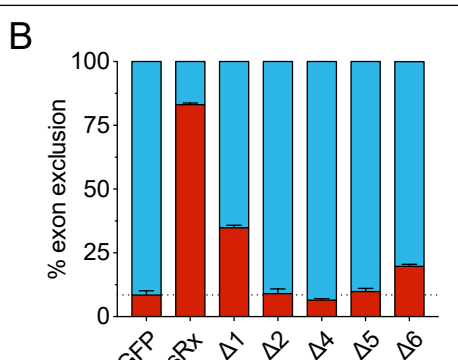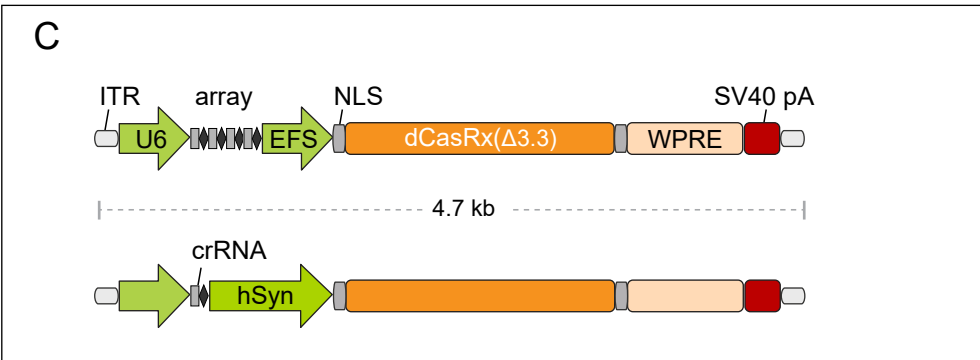

Supplement: NIHMS1506844-supplement-9.pdf [file NIHMS1506844-supplement-9.pdf]
